# Supplementary material for: Treatment-Resistant Depression and Ketamine Response in a Patient With Bilateral Amygdala Damage
Source: Atypon-hosted journal article supplement (doi:10.1176/appi.ajp.2019.18101219), 2019-12-01
Supplement: appi.ajp.2019.18101219.ds001.pdf [file appi.ajp.2019.18101219.ds001.pdf]

 


Psychiatry Online
